1 LABELLING HUMAN KINEMATICS DATA USING CLASSIFICATION MODELS

2 February 18<sup>th</sup>, 2022

3 Machine Learning Classification models can produce highly accurate sensor labels for  
4 motion data captured in the motion capture studio

5

6 Yuan Shi,<sup>1</sup> Nihar Chadderwala,<sup>2</sup> Ujjwal Ratan<sup>3</sup>

7 <sup>1</sup> Amazon Web Services, Singapore, Singapore

8 <sup>2</sup> Amazon Web Services, Dallas, TX, USA

9 <sup>3</sup> Amazon Web Services, Seattle, WA, USA

10

11 **Conflict of Interest Disclosure:** None.

12

13 **Correspondence Address:**

14 Ujjwal Ratan

15 Amazon Web Services,

16 2205 7<sup>th</sup> Avenue,

17 Seattle, WA 98121

18 Phone: (206) 615-5400, Email: [ujjwalr@amazon.com](mailto:ujjwalr@amazon.com)

19

20

21

22

23 **Abstract**

24 The goal of this study is to develop a classification model that can accurately and  
25 efficiently label human kinematics data. Kinematics data provides information about the  
26 movement of individuals by placing sensors on the human body and tracking their  
27 velocity, acceleration and position in three dimensions. These data points are available in  
28 C3D format that contains numerical data transformed from 3D data captured from the  
29 sensors. The data points can be used to analyse movements of injured patients or patients  
30 with physical disorders. To get an accurate view of the movements, the datasets generated  
31 by the sensors need to be properly labelled. Due to inconsistencies in the data capture  
32 process, there are instances where the markers have missing data or missing labels. The  
33 missing labels are a hindrance in motion analysis as it introduces noise and produces  
34 incomplete datapoints of sensor's positioning in 3 dimensional space. Labelling the data  
35 manually introduces substantial effort in the analysis process. In this paper, we will  
36 describe approaches to pre-process the kinematics data from its raw format and label the  
37 data points with missing markers using classification models.

38 **Keywords:** machine learning, c3d, biomechanics, classification model

39

40

41

42

43

44

45

46

## Introduction

47 Biomechanics refer to the study of mechanical laws relating to the movement of living  
48 organisms.(1) When applied to humans and combined with kinematics, it helps us capture  
49 data which is used to infer a variety of human actions. For example, kinematics data is  
50 used to understand human's movements in each gesture, through providing quantitative  
51 data to evaluate each individual's flexibility(2). It is also used to analyse patients'  
52 movements to track their recovery and assist towards rehabilitation(3). Kinematics data is  
53 captured in dedicated labs setup as motion capture studios. In some cases, the sensor data  
54 may not be labelled completely. This can happen for a variety of reasons like the sensor  
55 not being attached securely or some sensors getting blocked from a camera from certain  
56 angles. This introduces noise and missing values in the dataset and poses a challenge for  
57 further analysis of this data. Capturing movements of these patients and labelling them  
58 can be very tedious and an expensive process. To solve this problem, we describe a  
59 method where we use the labelled data from these sensors for training a classification  
60 model that can then label the unlabelled sensor records with high accuracy, thereby  
61 reducing manual efforts.

62 The primary objective of this study is to use a classification model to label the sensor data  
63 corresponding to the mounted location on the human subject's body. We took the records  
64 with pre-labelled information and built classification models that would identify the right  
65 class (sensor label) for the unlabeled dataset. In this study, we firstly clean and  
66 standardize the raw C3D files through data transformation functions. We then use the  
67 processed data to train 4 different machine learning models to classify the sensor data  
68 points into one of the multi-class labels. Lastly, we evaluate the performance of the

69 models to auto generate labels with test dataset. Interpretation and future work is  
70 provided at the end of the paper.

## 71 **Method**

72 In this section, we go into the details of our method starting with describing the raw  
73 dataset, data processing and feature engineering, modelling approaches including the  
74 choice of algorithms and the evaluation methods.

75

### 76 Data Description

77 For the purposes of this study, we downloaded the raw data from CMU Graphics Lab  
78 Motion Capture Database in *C3D* format(4), which is a file format that has been widely  
79 used in Biomechanics, Animation and Gait Analysis laboratories to record synchronized  
80 *3d* kinematics data. It contains information needed to read, display, and analyse *3d*  
81 motion data and additional analog data from force plates, electromyography,  
82 accelerometers, and other sensors. The dataset contains numerical data extracted from  
83 sensors attached to the human body. It is composed of a list of time-series points. Each  
84 point is composed of  $x$ ,  $y$  and  $z$  co-ordinates, time of capturing, frame number and the  
85 labeled location. The choice of number of sensors and locations mounted vary in each  
86 setting as it subjects to the purpose of specific biomedical study. For more details, readers  
87 can refer to CMU Graphics Lab Motion Capture Database (4) to visualize how the  
88 sensors are mounted on the human body to capture motion data.

89

90 The *C3D* dataset being captured can be converted into a standard dataframe (Table 1)  
91 using the *c3d* python library(5).

92 Table 1: C3D Sample File in DataFrame

| <b>time</b>   | <b>x</b> | <b>y</b> | <b>z</b> | <b>cam</b> | <b>err</b> | <b>frame</b> | <b>point_label</b> |
|---------------|----------|----------|----------|------------|------------|--------------|--------------------|
| <b>1.0125</b> | 0        | 0        | 0        | FALSE      | FALSE      | 1            | R_ASIS             |
| <b>1.0125</b> | 0        | 0        | 0        | FALSE      | FALSE      | 1            | L_ASIS             |
| <b>1.0125</b> | 0        | 0        | 0        | FALSE      | FALSE      | 1            | SACRUM             |
| <b>1.0125</b> | 0        | 0        | 0        | FALSE      | FALSE      | 1            | R_THIGH_1          |
| <b>1.0125</b> | 0        | 0        | 0        | FALSE      | FALSE      | 1            | R_THIGH_2          |

93 Note: This table captures the structure of a raw C3D file when its converted into a dataframe.

94

95 As shown in Table 1, a typical *C3D* dataset has 8 features, correspond to *time*, *x*, *y*, *z*,

96 *cam*, *err*, *frame* and *point\_label*. Here, *time* refers to the capture time of the point starting

97 from 0, *x*, *y* and *z* correspond to captured location at *x*, *y* and *z* axis respectively. *cam*

98 suggests if there is any camera observing the sensor. To ensure accuracy of captured data,

99 it is required to ensure that at least one camera is observing a sensor at the indicated time.

100 Otherwise, the data point is advised to be removed from the dataset. *err* suggests whether

101 there is error in capturing the *3d* location at this frame, and *frame* refers to the time frame

102 of the current position with continuous integer starting from 1. *Point\_labels* are the

103 labelled targets which indicate the location where the sensor is attached to.

104 In our experiment, we downloaded a collection of C3D files of *subject #26* provided by

105 Qualisys illustrating human gait(6). Among all the collections, we selected all the files

106 titled as hybrid walking motions, containing 5 C3D files in total.

### 107 Data Processing and Feature Engineering

108 Data processing is an important stage to prepare data for machine learning models. In

109 addition, data processing gives us a chance to gain insight into the data and perform

110 feature engineering. Using C3D python library (5), we were able to extract *x*, *y* and *z* co-

111 ordinates for each frame of the motion. We followed the following data processing steps :

112 1) Identify all missing values and convert them to NaN

113 An initial investigation of the dataset showed that all the missing values captured by  
114 sensors have been recorded as 0. As column  $z$  has only positive data, while both  $x$  and  $y$   
115 can have negative, positive and 0 values, we used  $z$  as reference to identify missing  
116 values and convert all the corresponding values from all axis to  $NaN$  if  $z=0$ .

117 2) Removal of missing values.

118 Removal of missing values includes:

119 a) removal of *sensors* which failed to capture locations with 50% or more  
120 of the total frames. After applying the filtering criteria, we were left with 19 labels  
121 among the initial 25 labels in total.

122 b) removal of *frames* with consecutive missingness  $>3$  as too many  
123 consecutive missingness will result in bad interpretation during data processing.

124 3) Interpolation

125 Polynomial interpolation was later carried out with sensors that contain missing  
126 values. We chose polynomial interpolation with 3-degree as it is simple and is  
127 still able to approximate complicated curves. As showed in the equation below,  
128 we refer to  $P(x)$  as the polynomial function with degree of 3.

$$L_{n,j}(x) = \prod_{k \neq j} \frac{x - x_k}{x_j - x_k}$$

$$P(x) = \sum_{j=0}^{n=3} y_j L_{n,j}(x)$$

### 129 3) Feature Engineering

130 Feature engineering was conducted on the sensor data based on kinetic understanding.  
131 The sensors are attached to human body, each part of human body will move according to  
132 a specific trajectory, thus the spatial change of each sensor can be a good indicator of  
133 where the sensor is mounted on the human body. Based on this assumption, we included  
134 the following features in our training set:

135 1) Absolute location:  $x$ ,  $y$  and  $z$  values directly generated from the device.

136 Here,  $t$  refers to the time point of measurement and  $x_t$ ,  $y_t$  and  $z_t$  refer to  
137 the absolute position of respective axis at time  $t$ .

138 2) Relative location: the relative rank of each sensor at time point  $t$ . It is  
139 calculated through ranking each point  $x$ ,  $y$  and  $z$  values among all the  $x$ ,  $y$   
140 and  $z$  at each time  $t$  accordingly. Let's take  $x$  for example.

$$141 \quad x_{tR} = Rank(x_t)$$

142  
143 3) Relative change (1-dimensional): the change to the current frame from  
144 previous  $i$  frame(s).

$$145 \quad x_{tRi} = x_t - x_{t-i}$$

146  
147 4) Relative change (3-dimentional): the change from previous frame to the  
148 current frame.

$$D_t = \sqrt{(x_{t_A} - x_{t-1_A})^2 + (y_{t_A} - y_{t-1_A})^2 + (z_{t_A} - z_{t-1_A})^2}$$

149 In the classification models, the raw data as absolute location (feature 1) plus time  
150 is used in our MLP base and LSTM models, while raw data and enhanced features  
151 1-4 are used in MLP and XGBoost classification.

152 After feature engineering, the first 4 files are connected together as training  
153 dataset and the file 5 is left as testing dataset.

#### 154 Modelling Algorithms

155 Our goal of the experiment was to accurately classify the sensor data into one of  
156 the 19 sensor labels in our dataset. We assumed the point\_label column as the  
157 target variable for this classification task. We selected multilayer perceptron  
158 (MLP) base model using scikit-learn, XGBoost and Long Short-Term Memory  
159 (LSTM) networks for this work.

160

#### 161 Baseline Model with Multi-Layer Perceptron

162 We decided to use Multilayer Perceptron (MLP) as our base model (Figure 1) as they are  
163 good for both classification and regression problem and can work very well with tabular  
164 dataset.

165

166 *Figure 1: Model topology of MLP baseline. In the basic model, we used raw kinematic*  
167 *data including time, frame, x, y and z as model input, with one hidden layer and output of*  
168 *23 values corresponding to the 23 unique sensor labels.*

169

170 MLPs are universal function approximators as shown by Cybenko's theorem(7),  
171 and it is a classical neural network where we have input layer, with one or more  
172 hidden layer and an output layer.

173

174

175

$$= \varphi(\sum_{i=1}^n x_i w_i + b) = (\quad + \quad)$$



176 Here,  $w$  denotes the vector of weights,  $x$  is the vector of inputs,  $b$  is the bias and  $\varphi$   
177 refers to the non-linear activation function.

178 Training MLP involves multiple passes on the dataset while at the same time  
179 adjusting weights and biases in relation to the error with the goal of reducing the  
180 error. MLP model adjusts the weights and biases using a technique called  
181 backpropagation. During forward pass, our input vector passes through the input  
182 layer and activation function. The result is then compared with the ground truth  
183 value to calculate the error using a loss function. In the backward pass, we  
184 compute the gradients using stochastic gradient descent algorithm and adjust the  
185 weights and biases. Weights and biases are adjusted in order to reduce the error  
186 when making classification.

### 187 Enhanced MLP

188 On top of all the absolute features that we included in MLP baseline model, we  
189 further included enhanced features as mentioned in 2.2 data processing section.

190 As evident from the diagram (Figure 2), additional features are fed into the model as  
191 inputs. Features such as frame and time were removed for this model while new features  
192 such as changes of position in  $x$ ,  $y$  and  $z$  from previous time point to current time point  
193 were added. Training the model using feature engineered data helped improve the model.

194

195 *Figure 2: Model topology of MLP enhanced. In this enhanced model, we included*  
196 *features as introduced in method section while retaining model structure as baseline*  
197 *model.*

198

199

200

## 201 XGBoost

202 XGBoost was initially proposed by *Chen and Guestrin* in 2016(8) and it  
203 implements machine learning algorithms under the Gradient Boosting  
204 framework(9). Specifically, XGBoost is a decision-tree-based ensemble machine  
205 learning algorithm based on optimized distributed gradient boosting library and is  
206 thus highly efficient, flexible and portable. We followed the default  
207 hyperparameters, except for *objective* being changed to *multi:softmax* and the  
208 *number\_class* being changed to the corresponding 19 classes in the raw C3D  
209 dataset.

## 210 LSTM

211 Long short-term memory (LSTM) is an artificial recurrent neural network (RNN)  
212 architecture(10) with a LSTM unit composed of a cell, an input gate, an output gate and a  
213 forget gate. For the model topology (Table-2), a sequential model which is a linear stack  
214 of layers is used. the first layer is an LSTM layer with memory units and it returns  
215 sequence. A dropout layer is applied to avoid overfitting of the model; after that, a dense  
216 layer with activation algorithm of *relu* is added, followed by a dense layer with *softmax*  
217 function for classification.

218 For the hyperparameters, we set target to maximize *categorical\_crossentropy*,  
219 with 80 epochs and batch size of 100.

220 Table 2: Model topology of LSTM

| 221 | =====               |              |         |
|-----|---------------------|--------------|---------|
| 222 | Layer (type)        | Output Shape | Param # |
| 223 | =====               |              |         |
| 224 | lstm_2 (LSTM)       | (None, 50)   | 10800   |
| 225 | -----               |              |         |
| 226 | dropout_2 (Dropout) | (None, 50)   | 0       |

|     |                          |             |      |
|-----|--------------------------|-------------|------|
| 227 | <hr/>                    |             |      |
| 228 | dense_3 (Dense)          | (None, 128) | 6528 |
| 229 | <hr/>                    |             |      |
| 230 | dense_4 (Dense)          | (None, 19)  | 2451 |
| 231 | <hr/>                    |             |      |
| 232 | Total params: 19,779     |             |      |
| 233 | Trainable params: 19,779 |             |      |
| 234 | Non-trainable params: 0  |             |      |
| 235 | <hr/>                    |             |      |
| 236 |                          |             |      |

## 237 Model Evaluation Approach

### 238 F1 score

239 We are dealing with multi-class classification for a set of time-series data points and the  
240 purpose is to classify each set of data into one of the classes. The total dataset is randomly  
241 split into training and testing dataset with ratio of 0.8, 0.2. Evaluation is carried out on the  
242 testing dataset. As the data labels are not uniformly distributed, we chose the F1 score as  
243 the harmonic mean of the precision and recall.

$$F1\ score = 2 * \frac{precision * recall}{precision + recall}$$

$$accuracy = \frac{1}{N} \sum_{k=1}^{|G|} \sum_{x: g(x,y,z)} I(g(x,y,z) = \widehat{g})$$

244 Where *precision* (also called positive predictive value) is the fraction of true  
245 positive samples among the predicted true samples, while *recall* (also known  
246 as sensitivity) is the fraction of true positive samples among all the positive  
247 samples.

### 248 Confusion matrix

249 A confusion matrix is also known as an error matrix. It is a table layout that allows  
250 visualization of the performance of a supervised learning model. Each row of  
251 the matrix represents the instances in an actual class while each column represents the  
252 instances in a predicted class, or vice versa.

253

## Results

254 Both training dataset and testing dataset were applied with the same data cleaning  
255 strategies with polynomial interpolation and all the feature engineering as described in the  
256 methodology. After that, we built four models with MLP baseline, MLP enhanced model,  
257 XGBoost enhanced model and LSTM using training dataset. The performance was  
258 measured on the testing dataset.

### 259 Model Accuracy

260 The Table 3 below showed performance (F1 score) of the four models with the same  
261 testing dataset. As shown in the table, XGBoost showed highest performance with f1  
262 score at 0.94, followed by MLP enhanced (F1 score=0.86), LSTM(F1 score=0.65) and  
263 MLP baseline (F1 score=0.64).

264 Table 3: Performance comparison among 4 models

| Model            | Algorithm | Feature                                       | F1 score |
|------------------|-----------|-----------------------------------------------|----------|
| MLP baseline     | MLP       | absolute location, frame                      | 0.64     |
| MLP enhanced     | MLP       | absolute location, relative location, changes | 0.86     |
| XGboost enhanced | XGBoost   | absolute location, relative location, changes | 0.94     |
| LSTM             | LSTM      | absolute location                             | 0.66     |

265 *Note: This table captures the results of the various algorithms and models used in the evaluation with*  
266 *their corresponding F1 scores.*

### 267 Confusion matrix to show agreement between truth and prediction from the model

268 As XGboost showed highest performance among all the 4 models, we chose predictions  
269 from XGboost and use a confusion matrix to demonstrate the agreement between true  
270 labels and model output (Figure 3). As illustrated by the side bar, lighter colors refer to  
271 higher number while darker colors indicate lower number. In the confusion matrix, we  
272 can observe that the matrix diagonal are in lighter color, suggesting high agreement  
273 between true labels and predicted labels. Nevertheless, Mislabelling was observed,  
274 especially more frequent between *R\_HEEL* and *R\_MT5*.

275 *Figure 3: Confusion matrix of true labels and predicted labels from model with XGBoost.*

276

### 277 Feature Importance

278 As XGboost showed highest accuracy among all the model, we further examined  
279 the model by checking feature importance. As we can see in figure 4, it showed  
280 that relative location of  $y$  together with  $z$  has the highest importance in the  
281 modelling, followed by absolute position of  $z$ .

282 *Figure 4: Feature Importance from model with XGBoost.*

283

## 284 **Discussion**

285 Capturing human kinematics data requires mounting sensors to pre-defined positions on  
286 different parts of the subject's body, which may lead to missing labels. In current motion  
287 capture pipelines, manual validation and labelling is a time consuming and labour  
288 intensive postprocessing step and may become a bottleneck for downstream analysis.  
289 Prior to this, Holzreiter(11) used neural network to estimate the positions of sorted  
290 markers from a shuffled set through pairing up the marker locations with the shuffled set  
291 using the nearest neighbour search. Meyer *et al.*(12) estimated the skeletal configuration  
292 by least-squares optimization and exploited the skeletal model to automatically label the  
293 markers. Besides, Han *et al.*(13) proposed auto-labelling approaches specifically for  
294 labelling hands' kinematics data through keypoint regression problem solved with  
295 convolutional neural networks. In addition, Saeed *et al.*(14) used a data-driven approach  
296 for automatic labelling through permutation estimation where shuffled markers are ranked  
297 based on a pre-defined order.

298 While the previous work has no labelled data and tried to classify the kinematic data to  
299 different locations according to the temporal profile, our work targets to label kinematic  
300 data with missing labels. Specifically, the problem we are focusing on is the data quality  
301 of the captured data with majority of the data being labelled and a few missing data points  
302 due to technical errors. After effective feature engineering and modeling with 3 selected  
303 model algorithms, we are able to achieve decent classification outcome with F1-score over  
304 90%.

305 The list of features, model performance and feature importance will vary based on the  
306 type of motion being captured by the sensors. In this experiment, we used the motion data  
307 of a walking subject, on which over 20 sensors were mounted. Since the motion was  
308 horizontal, all sensors moved by similar distance along the  $x$  axis as the subject moved.  
309 As a result, the relative position of  $x$  did not contribute as much to differentiation of  
310 sensors, as compared to  $y$  and  $z$  axes, because the sensors were mounted at different  
311 heights on the subject's body. To apply the models to other movements, we need to retrain  
312 the model with least effort since the list of features, model performance and feature  
313 importance will vary based on the type of motions being captured by the sensors. We also  
314 noticed that appropriate feature engineering was essential to get higher accuracy. By  
315 using relative locations of the sensors along the  $x$ ,  $y$  and  $z$  axes, we were able to improve  
316 the performance of the model by over 31% compared to the baseline model that used just  
317 the absolute locations of the sensors. This shows that relative location was the key factor  
318 in determining the appropriate sensors.

319

## Conclusion

320 We tested different data transformation and machine learning algorithms to develop a  
321 multi-class classification model that can label kinematics data with high accuracy. It was  
322 also important to apply techniques on kinematics timeseries data as it helped us to  
323 improve the model. Calculating the 1-dimensional and 3-dimensional relative change to  
324 the frames helped with creation of new features. These techniques improved the model  
325 performance considerably. XGBoost model gave the best performance compared to the  
326 neural architecture models. The models can be used to accurately label the three-  
327 dimensional motion data which can provide insights into movements of a patient with  
328 injury or a patient with disability. Analyzing these movements can further help in either  
329 creating a recovery plan or an exoskeleton that can aid in recovery.

330

### 331 **Reference**

- 332 1. Hatze H. The meaning of the term biomechanics. *J Biomech.* 1974;7(12):189–190.
- 333 2. An K, EY C. Kinematic analysis of human movement. *Ann Biomed Eng.*  
334 1984;12(6):585-97. doi: 10.1007/BF02371451. PMID: 6534225. *Ann Biomed Eng.*  
335 1984;12(6):585–97.
- 336 3. Bahl JS, Nelson MJ, Taylor M, Solomon LB, Arnold JB, Thewlis D.  
337 Biomechanical changes and recovery of gait function after total hip arthroplasty for  
338 osteoarthritis: a systematic review and meta-analysis. *Osteoarthr Cartil.*  
339 2018;26(7):847–63.
- 340 4. CMU Graphics Lab Motion Capture Database [Internet]. Available from:  
341 <http://mocap.cs.cmu.edu/faqs.php>
- 342 5. Lab TEC. c3d 0.3.0 [Internet]. Python Library. Available from:

- 343 <https://pypi.org/project/c3d/>
- 344 6. C3D.ORG. No Title. p. <https://www.c3d.org/sampled.html>.
- 345 7. Cybenko G. Approximation by superpositions of a sigmoidal function. Math  
346 Control Signals, Syst. 1989;2(4):303–314.
- 347 8. Chen T, Guestrin C. XGBoost: A scalable tree boosting system. In: Proceedings of  
348 the ACM SIGKDD International Conference on Knowledge Discovery and Data  
349 Mining. 2016.
- 350 9. Friedman JH. Greedy Function Approximation: A Gradient Boosting Machine.  
351 1999;
- 352 10. Schmidhuber SHJ. Long short-term memory. Neural Comput. 1997;9(8):1735–  
353 1780.
- 354 11. Holzreiter S. Autolabeling 3D tracks using neural networks. Clin Biomech.  
355 2005;20(1):1–8.
- 356 12. Meyer J, Kuderer M, Müller J, Burgard W. Online marker labeling for fully  
357 automatic skeleton tracking in optical motion capture. 2014 IEEE Int Conf Robot  
358 Autom. 2014;
- 359 13. HAN S, LIU B, WANG R, Ye Y, TWIGG CD, KIN K. Online Optical Marker-  
360 based Hand Tracking with Deep Labels. ACM Trans Graph. 2018;37(4).
- 361 14. Ghorbani S, Etemad A, Troje N. Auto-labelling of Markers in Optical Motion  
362 Capture by Permutation Learning. Comput Vis Pattern Recognit. 2019;167–78.
- 363



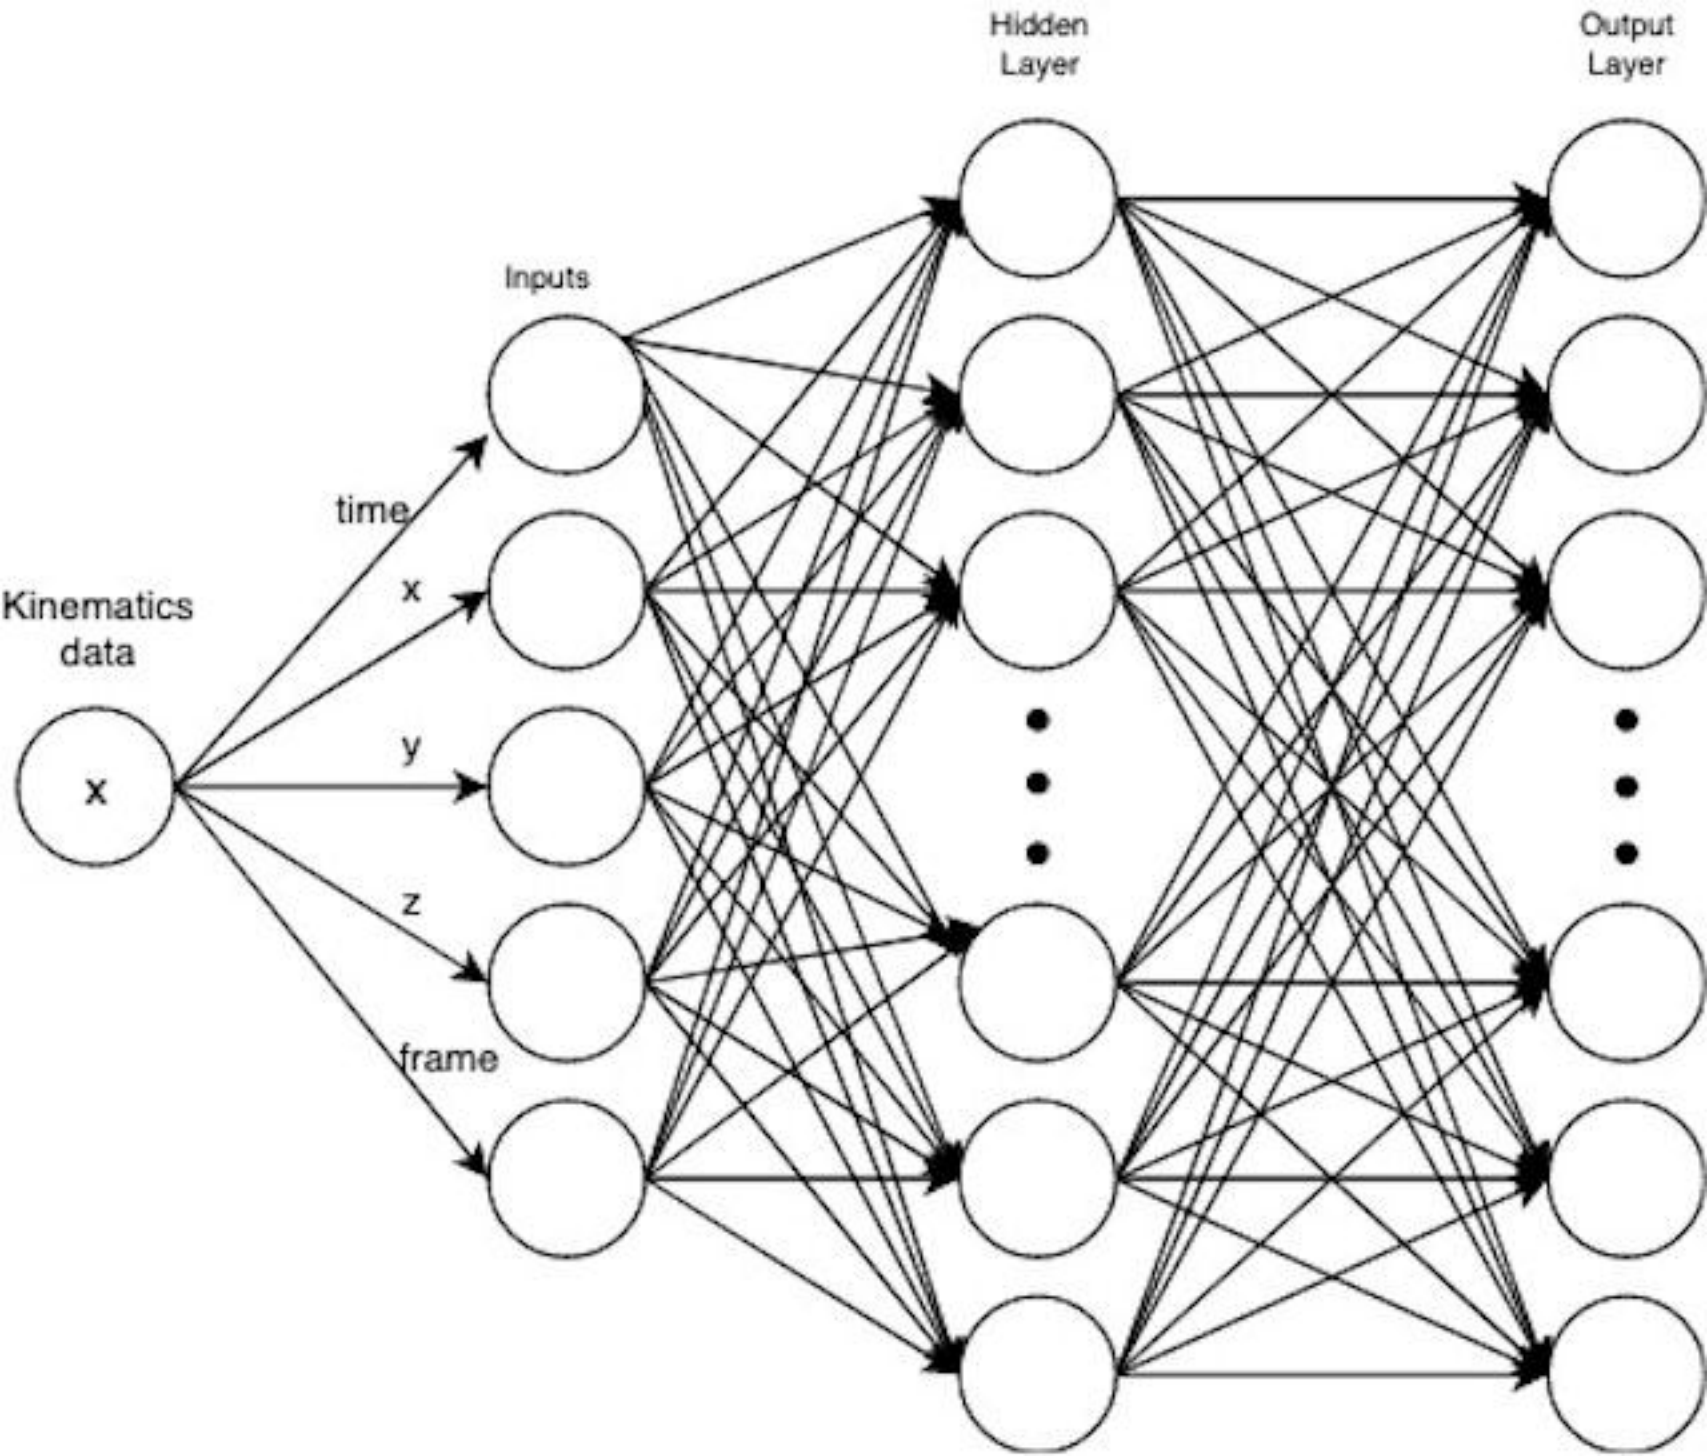

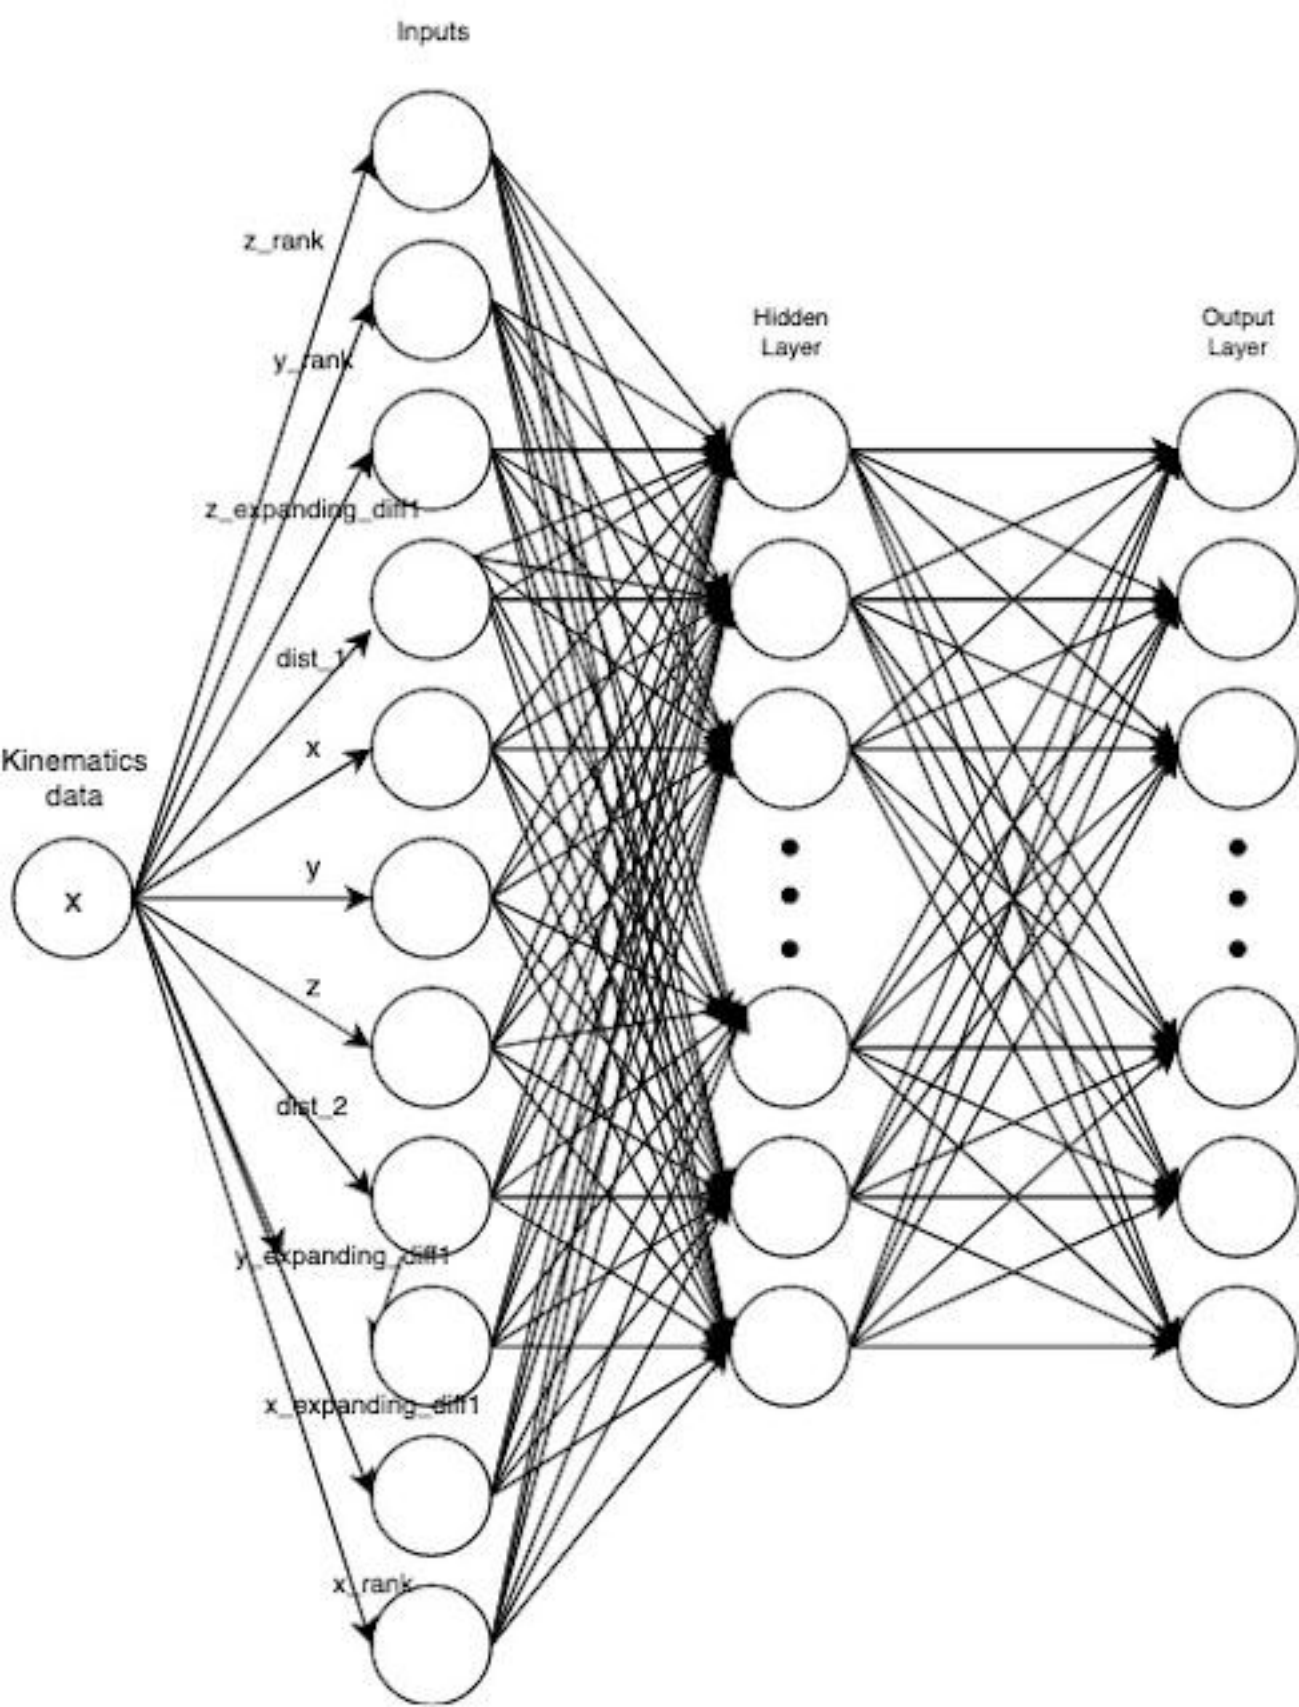

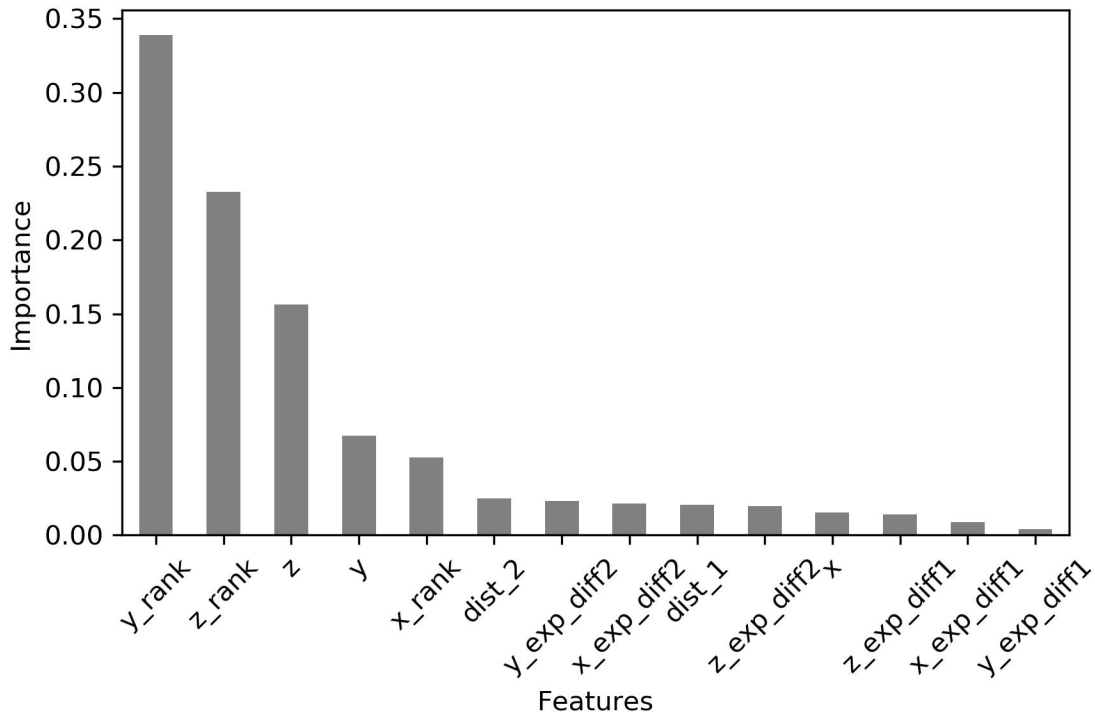

Source: https://medrxiv.org/content/10.1101/2022.02.18.22271206v1.full.pdf
